# Supplementary material for: Effects of Sub-Chronic Exposure to Imidacloprid on Reproductive Organs of Adult Male Rats: Antioxidant State, DNA Damage, and Levels of Essential Elements
Source: MDPI journal article supplement (doi:10.3390/antiox10121965), 2021-12-08
Supplement: s1 [file s1]

**Table S1.** Weight of testis/epididymis, antioxidant parameters and concentration of essential elements in tissues (testis, epididymis) and % of DNA damage in testicular haploid/diploid and epididymal sperm cells of Wistar rats (N=5 rats per group). Rats are treated orally for 28 consecutive days with imidacloprid at doses of 0.06 mg/kg b. w./day, 0.8 mg/kg b. w./day and 2.25 mg/kg b. w./day. Data are expressed as mean  $\pm$  standard deviation, median and range (min – max).

|                                         | NEGATIVE CONTROL                         | 0.06 mg/kg b. w./day                     | 0.8 mg/kg b. w./day                      | 2.25 mg/kg b. w./day                     |
|-----------------------------------------|------------------------------------------|------------------------------------------|------------------------------------------|------------------------------------------|
| <b>ORGAN WEIGHT</b>                     |                                          |                                          |                                          |                                          |
| <b>TESTIS (g)</b>                       | 1.62 $\pm$ 0.15<br>1.56 (1.48-1.80)      | 1.56 $\pm$ 0.13<br>1.62 (1.38-1.68)      | 1.48 $\pm$ 0.13<br>1.48 (1.38-1.57)      | 1.30 $\pm$ 0.17<br>1.27 (1.08-1.49)      |
| <b>EPIDIDYMIS (g)</b>                   | 0.865 $\pm$ 0.106<br>0.807 (0.778-1.019) | 0.809 $\pm$ 0.061<br>0.790 (0.744-0.891) | 0.741 $\pm$ 0.084<br>0.729 (0.624-0.858) | 0.792 $\pm$ 0.090<br>0.774 (0.708-0.918) |
| <b>ANTIOXIDANT PARAMETERS</b>           |                                          |                                          |                                          |                                          |
| <b>TESTIS</b>                           |                                          |                                          |                                          |                                          |
| <b>GSH (<math>\mu</math>g/g tissue)</b> | 12.3 $\pm$ 1.3<br>12.4 (10.6-13.7)       | 11.3 $\pm$ 1.4<br>10.8 (9.86-13.5)       | 12.3 $\pm$ 1.5<br>12.1 (10.8-14.5)       | 11.1 $\pm$ 3.1<br>11.1 (7.38-14.7)       |
| <b>GPx (U/g protein)</b>                | 179 $\pm$ 55<br>179 (127-231)            | 219 $\pm$ 65<br>216 (158-319)            | 279 $\pm$ 72<br>307 (197-333)            | 206 $\pm$ 67<br>193 (135-308)            |
| <b>SOD (U/g protein)</b>                | 12269 $\pm$ 3222<br>11726 (9352-15727)   | 15940 $\pm$ 870<br>15659 (15244-16916)   | 14111 $\pm$ 1784<br>14463 (12177-15692)  | 13072 $\pm$ 1355<br>12865 (11832-14519)  |
| <b>EPIDIDYMIS</b>                       |                                          |                                          |                                          |                                          |
| <b>GSH (<math>\mu</math>g/g tissue)</b> | 1.33 $\pm$ 0.19<br>1.41 (1.06-1.50)      | 2.30 $\pm$ 0.60<br>2.19 (1.61-3.23)      | 1.68 $\pm$ 0.60<br>1.71 (0.95-2.49)      | 1.35 $\pm$ 0.36<br>1.29 (0.84-1.70)      |
| <b>GPx (U/g protein)</b>                | 281 $\pm$ 55<br>269 (232-351)            | 487 $\pm$ 70<br>483 (415-568)            | 432 $\pm$ 79<br>429 (335-513)            | 539 $\pm$ 57<br>538 (471-598)            |
| <b>SOD (U/g protein)</b>                | 17501 $\pm$ 1036<br>17057 (16315-18858)  | 24347 $\pm$ 2534<br>24079 (22283-28626)  | 22532 $\pm$ 2505<br>22017 (20525-26826)  | 22008 $\pm$ 1387<br>22561 (20031-23511)  |
| <b>ESSENTIAL ELEMENTS</b>               |                                          |                                          |                                          |                                          |
| <b>TESTIS</b>                           |                                          |                                          |                                          |                                          |
| <b>Na (mg/g)</b>                        | 1562 $\pm$ 56<br>1555 (1503 – 1653)      | 1546 $\pm$ 27<br>1541 (1516 – 1588)      | 1636 $\pm$ 67<br>1646 (1540 – 1715)      | 1679 $\pm$ 82<br>1695 (1545 – 1767)      |
| <b>Mg (mg/g)</b>                        | 194 $\pm$ 16<br>198 (171 – 213)          | 194 $\pm$ 16<br>195 (176 – 212)          | 197 $\pm$ 11<br>201 (179 – 209)          | 200 $\pm$ 21<br>201 (168 – 225)          |
| <b>Ca (mg/g)</b>                        | 56.1 $\pm$ 10.5<br>52.3 (49.3 – 74.8)    | 49.8 $\pm$ 4.7<br>50.3 (44.2 – 56.7)     | 53.0 $\pm$ 4.5<br>51.9 (48.7 – 60.5)     | 59.8 $\pm$ 14.5<br>54.0 (49.7 – 85.2)    |
| <b>K (mg/g)</b>                         | 4149 $\pm$ 302<br>4282 (3805 – 4420)     | 4199 $\pm$ 362<br>4272 (3798 – 4597)     | 4280 $\pm$ 260<br>4378 (3819 – 4447)     | 4156 $\pm$ 361<br>4311 (3661 – 4557)     |
| <b>Fe (mg/g)</b>                        | 24.3 $\pm$ 2.1<br>24.2 (21.1 – 26.8)     | 24.6 $\pm$ 1.6<br>24.9 (22.9 – 26.8)     | 25.3 $\pm$ 0.7<br>25.0 (24.6 – 26.2)     | 25.0 $\pm$ 3.4<br>24.4 (21.5 – 30.6)     |
| <b>Cu (mg/g)</b>                        | 2.09 $\pm$ 0.16<br>2.14 (1.85 – 2.25)    | 2.04 $\pm$ 0.13<br>2.01 (1.88 – 2.23)    | 2.05 $\pm$ 0.04<br>2.04 (2.00 – 2.11)    | 2.05 $\pm$ 0.23<br>2.08 (1.67 – 2.30)    |

|                                 |                                   |                                   |                                   |                                   |
|---------------------------------|-----------------------------------|-----------------------------------|-----------------------------------|-----------------------------------|
| <b>Zn (mg/g)</b>                | 27.3 ± 1.0<br>27.7 (25.9 – 28.5)  | 27.3 ± 2.1<br>27.3 (24.9 – 29.8)  | 27.4 ± 1.5<br>27.8 (25.1 – 28.9)  | 26.3 ± 5.2<br>27.9 (18.6 – 32.1)  |
| <b>Se (µg/g)</b>                | 967 ± 21<br>966 (940 – 996)       | 937 ± 68<br>925 (859 – 1021)      | 949 ± 58<br>965 (852 – 997)       | 925 ± 184<br>965 (671 – 1162)     |
| <b>Mo (µg/g)</b>                | 60.5 ± 7.8<br>60.6 (51.3 – 72.4)  | 59.6 ± 3.5<br>59.0 (55.8 – 65.0)  | 72.9 ± 7.9<br>76.5 (58.8 – 76.9)  | 73.9 ± 9.1<br>72.5 (63.2 – 88.2)  |
| <b>Mn (µg/g)</b>                | 332 ± 34<br>331 (295 – 376)       | 326 ± 33<br>321 (300 – 381)       | 329 ± 10<br>327 (317 – 341)       | 359 ± 76<br>337 (272 – 477)       |
| <b>EPIDIDYMISS</b>              |                                   |                                   |                                   |                                   |
| <b>Na (mg/g)</b>                | 1127 ± 148<br>1038 (985 – 1292)   | 1319 ± 236<br>1416 (971 – 1472)   | 1477 ± 398<br>1331 (1210 – 2182)  | 1314 ± 107<br>1338 (1209 – 1463)  |
| <b>Mg (mg/g)</b>                | 108 ± 21<br>110 (76.3 – 128)      | 129 ± 37<br>129 (83.7 – 174)      | 141 ± 55<br>128 (90.8 – 234)      | 116 ± 13<br>114 (98.3 – 135)      |
| <b>Ca (mg/g)</b>                | 71.5 ± 17.9<br>72.7 (51.4 – 99.2) | 66.2 ± 5.0<br>65.4 (61.6 – 72.6)  | 77.6 ± 12.3<br>79.8 (64.5 – 90.5) | 77.4 ± 19.2<br>66.5 (60.1 – 102)  |
| <b>K (mg/g)</b>                 | 1499 ± 247<br>1469 (1172 – 1794)  | 1785 ± 390<br>1875 (1237 – 2154)  | 2009 ± 741<br>1724 (1396 – 3291)  | 1669 ± 145<br>1620 (1544 – 1911)  |
| <b>Fe (mg/g)</b>                | 19.1 ± 1.7<br>18.2 (17.6 – 21.0)  | 19.0 ± 1.8<br>19.1 (16.9 – 21.0)  | 21.0 ± 5.4<br>18.3 (16.3 – 29.8)  | 21.0 ± 4.7<br>19.9 (17.1 – 28.9)  |
| <b>Cu (mg/g)</b>                | 1.45 ± 0.26<br>1.37 (1.16 – 1.85) | 1.59 ± 0.37<br>1.70 (1.08 – 1.91) | 1.78 ± 0.67<br>1.46 (1.32 – 2.95) | 1.48 ± 0.22<br>1.58 (1.09 – 1.61) |
| <b>Zn (mg/g)</b>                | 26.5 ± 4.8<br>24.1 (22.4 – 32.3)  | 28.9 ± 8.4<br>30.5 (17.8 – 36.5)  | 31.5 ± 14.0<br>27.0 (18.6 – 55.4) | 26.9 ± 2.1<br>27.3 (24.1 – 28.8)  |
| <b>Se (µg/g)</b>                | 937 ± 169<br>851 (791 – 1131)     | 993 ± 238<br>1003 (712 – 1255)    | 1062 ± 475<br>916 (652 – 1877)    | 945 ± 81<br>968 (828 – 1015)      |
| <b>Mo (µg/g)</b>                | 58.8 ± 5.4<br>56.7 (53.1 – 67.5)  | 69.8 ± 13.3<br>72.7 (51.4 – 82.4) | 69.6 ± 8.3<br>71.8 (58.0 – 76.8)  | 71.0 ± 6.6<br>68.6 (65.2 – 82.3)  |
| <b>Mn (µg/g)</b>                | 208 ± 32<br>203 (178 – 258)       | 242 ± 57<br>260 (164 – 286)       | 276 ± 103<br>237 (172 – 441)      | 238 ± 39<br>219 (207 – 298)       |
| <b>% DNA DAMAGE</b>             |                                   |                                   |                                   |                                   |
| <b>HAPLOID TESTICULAR CELLS</b> | 1.81 ± 2.73<br>0.421 (0 - 13.9)   | 2.53 ± 3.16<br>1.14 (0 - 16.0)    | 2.60 ± 3.16<br>1.25 (0 - 18.4)    | 2.32 ± 3.01<br>1.06 (0 - 16.8)    |
| <b>DIPLOID TESTICULAR CELLS</b> | 1.68 ± 2.24<br>0.587 (0 - 15.4)   | 2.37 ± 2.87<br>1.16 (0 - 18.8)    | 2.26 ± 2.66<br>1.15 (0 - 14.1)    | 2.32 ± 2.96<br>1.00 (0 - 15.7)    |
| <b>EPIDIDYMAL CELLS</b>         | 2.36 ± 2.93<br>1.06 (0 - 18.0)    | 3.15 ± 3.34<br>2.02 (0 - 16.0)    | 2.38 ± 3.00<br>0.977 (0 - 14.9)   | 2.35 ± 2.98<br>1.11 (0 - 17.3)    |
